# Supplementary material
Source: PubMed Central journal article supplement (PMC5373454)
Supplement: ASN.2016050546SupplementaryData.pdf [file ASN.2016050546SupplementaryData.pdf]

## SUPPLEMENTAL INFORMATION

**Figure S1.**

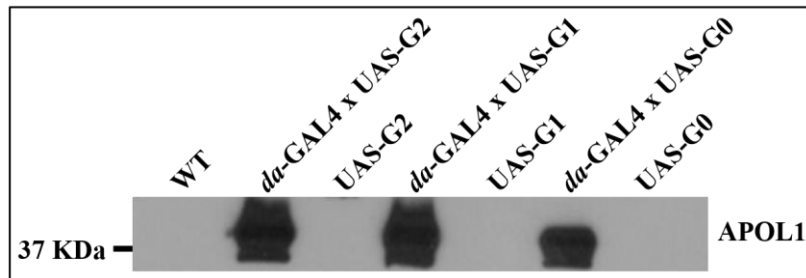

**Supplemental Figure 1. Western analysis of *D. melanogaster* larvae hemolymph, expressing APOL1 G0, G1, G2 gene products under *da*-GAL4.** APOL1 is expressed in the hemolymph of larvae. Hemolymph was extracted from individual larvae and pooled for each transgenic strain. Equal total protein (50  $\mu$ g) per lane was loaded.

**Figure S2.**

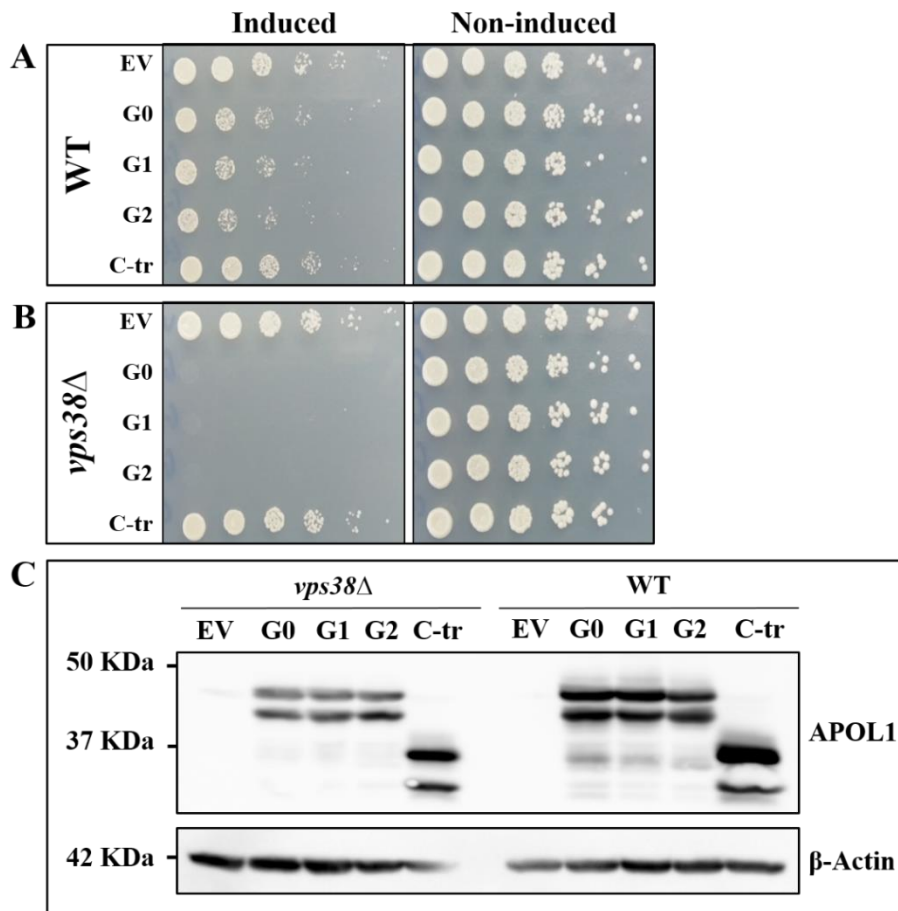

**Supplemental Figure 2. Hypersensitivity of the *vps38Δ* to ApoL1.** Plasmids containing the human *APOL1* variants, under the yeast GAL1 promoter, were transformed into WT and *vps38Δ* strains. Drop titration growth assay results are shown for (A) WT and (B) *vps38Δ*. Each row represents serial fivefold dilutions (left to right) of a suspension of cells transformed with the indicated plasmid, spotted on plates containing glucose (right panel – non-induced conditions) or galactose (left panel - induced conditions). (C) Western analysis of APOL1 expression. APOL1 was induced for 3 hours on synthetic minimal media containing essential amino acids and galactose. β-actin serves as a control for protein loading. EV- empty vector, C-tr- C-truncated *APOL1*.

**Figure S3.**

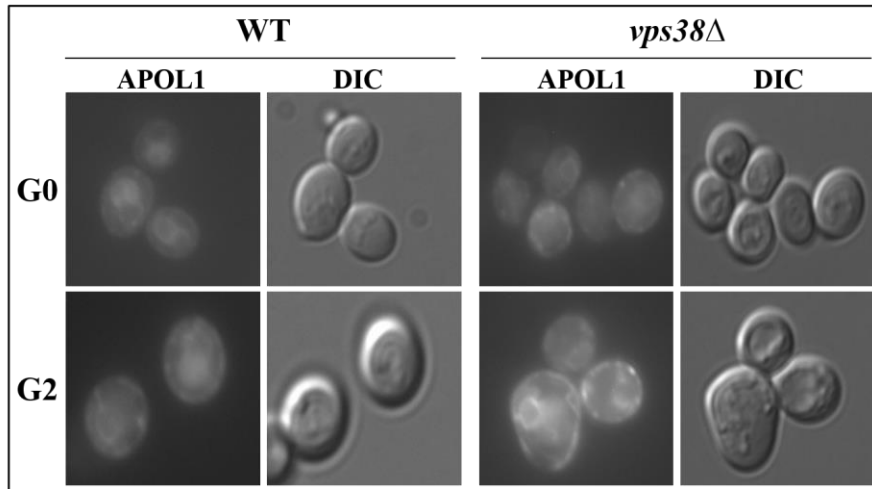

**Supplemental Figure 3. Lack of APOL1 vacuolar localization in the *vps38*Δ strain.** *APOL1* variants were tagged with mCherry at their C-terminus and expressed in WT and *vps38*Δ strains. *APOL1* expression was induced for 3 hours on synthetic minimal media containing essential amino acids and galactose. DIC- differential interference contrast.

**Figure S4.**

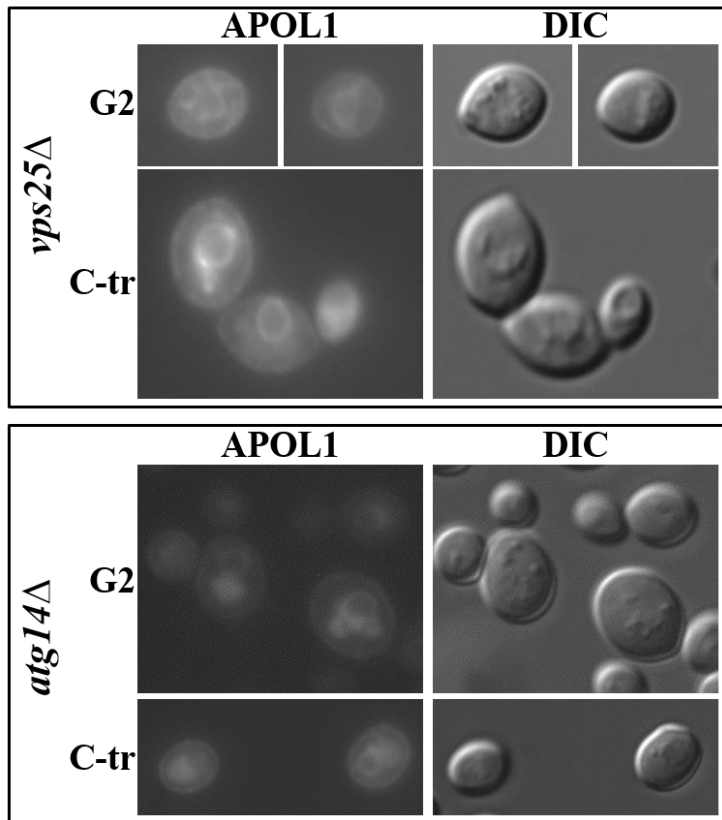

**Supplemental Figure 4. APOL1 vacuolar localization is defective in endocytic mutant (*vps25Δ*), but not in the autophagic mutant (*atg14Δ*).** *APOL1* variants were tagged with mCherry at their N-terminus sequence (after the signal peptide, see Concise methods) and expressed in the indicated strains. *APOL1* expression was induced for 3 hours on synthetic minimal media containing essential amino acids and galactose. C-tr- C-truncated *APOL1*; DIC- differential interference contrast.

**Figure S5.**

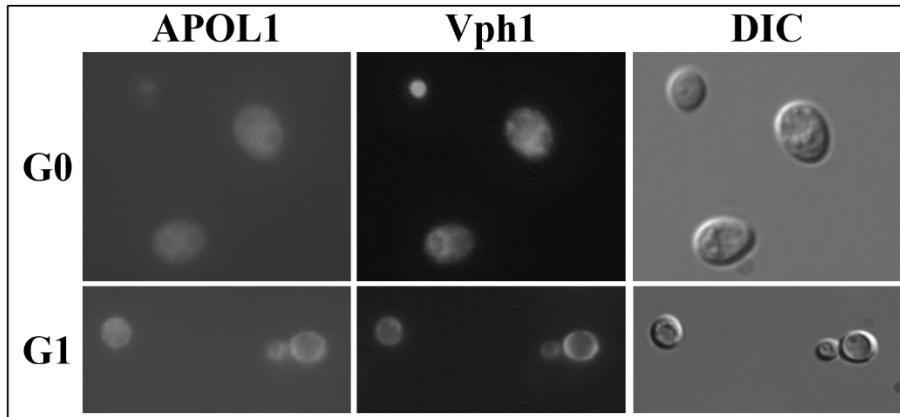

**Supplemental Figure 5. Defective transport of Vph1 in yeast expressing G0 and G1 APOL1 variants.** Plasmids containing the human APOL1 variants, under the yeast GAL1 promoter, were transformed into *S. cerevisiae* expressing GFP-Vph1. In the WT strain, as well in the C-tr APOL1, Vph1-GFP localized normally to the vacuole, whereas APOL1 expression (G0, G1) inhibited Vph1 trafficking to the vacuole, which was missorted to multiple punctate compartments. DIC-differential interference contrast.

**Supplemental Table S1: APOL1 variants increase lethality of *vps38Δ* strain.**

| <b>APOL1 variant comparison</b> | <b>variant 1: 8h/0h ratio</b> | <b>variant 2: 8h/0h ratio</b> | <b>p value for difference†</b> |
|---------------------------------|-------------------------------|-------------------------------|--------------------------------|
| G0–EV                           | 0.28                          | 0.83                          | <0.0001                        |
| G1–G0                           | 0.22                          | 0.28                          | 0.0070                         |
| G2–G0                           | 0.20                          | 0.28                          | 0.0001                         |
| G2–G1                           | 0.20                          | 0.22                          | 0.1663                         |
| C-trunc–EV                      | 0.78                          | 0.83                          | 0.4149                         |

| <b>APOL1 variant</b> | <b>WT: 8h/0h ratio</b> | <b><i>vps38Δ</i>: 8h/0h ratio</b> | <b>p value for difference</b> |
|----------------------|------------------------|-----------------------------------|-------------------------------|
| EV                   | 0.86                   | 0.83                              | 0.5441                        |
| G0                   | 0.71                   | 0.28                              | <0.0001                       |
| G1                   | 0.55                   | 0.22                              | <0.0001                       |
| G2                   | 0.45                   | 0.20                              | <0.0001                       |
| C-trunc              | 0.82                   | 0.78                              | 0.4466                        |

Survival assays were conducted as described in Methods, with measurement of surviving cells determined as colony forming units (CFU) expressed as ratios at 0 hours and 8 hours of induction for each experimental condition. Each pair of experiments was conducted in parallel for all conditions 3 times, and p values for differences determined as described in Methods. Top table show ratios of surviving cells at 8 versus 0 hours for each experimental condition in the comparison pair and the corresponding p value for the difference. The bottom table shows the survival ratios for each APOL1 experimental condition in the WT (non-*vps38Δ*) versus *vps38Δ* strain, and the corresponding p value for the comparison. EV- empty vector, C-tr- C-terminus truncated APOL1.

**Supplemental Table S2: *S. cerevisiae* deleted strains that enhanced *APOLI* toxicity.**

| <b>Golgi/<br/>endosome to<br/>endosome<br/>trafficking</b>                                       | <b>Endosome to<br/>Golgi<br/>trafficking</b>                                                        | <b>Endosome<br/>maturation-<br/>MVB</b>                            | <b>Endosome<br/>to vacuole<br/>trafficking</b>                                                   | <b>Golgi to<br/>vacuole<br/>trafficking</b> | <b>Endosome<br/>/vacuole<br/>acidification</b> |
|--------------------------------------------------------------------------------------------------|-----------------------------------------------------------------------------------------------------|--------------------------------------------------------------------|--------------------------------------------------------------------------------------------------|---------------------------------------------|------------------------------------------------|
| <b>CORVET</b><br><i>vps3Δ</i><br><i>vps8Δ</i><br><i>vps16Δ</i><br><i>vps18Δ</i><br><i>vps33Δ</i> | <b>RETROMER</b><br><i>vps5Δ</i><br><i>vps17Δ</i><br><i>vps26Δ</i><br><i>vps29Δ</i><br><i>vps35Δ</i> | <b>ESCRT 0</b><br><i>vps27Δ</i>                                    | <b>HOPS</b><br><i>vps39Δ</i><br><i>vps41Δ</i><br><i>vps16Δ</i><br><i>vps18Δ</i><br><i>vps33Δ</i> | <i>apm3Δ</i>                                | <i>vma1Δ</i><br><i>vma21Δ</i>                  |
| <i>pep5Δ</i><br><i>pep7Δ</i><br><i>pep12Δ</i>                                                    |                                                                                                     | <b>ESCRT I</b><br><i>vps37Δ</i><br><i>vps28Δ</i>                   | <i>vam3Δ</i><br><i>vam7Δ</i>                                                                     |                                             |                                                |
| <i>vps13Δ</i><br><i>ypt6Δ</i>                                                                    |                                                                                                     | <b>ESCRT II</b><br><i>vps25Δ</i><br><i>vps36Δ</i>                  |                                                                                                  |                                             |                                                |
|                                                                                                  |                                                                                                     | <b>ESCRT III</b><br><i>vps2Δ</i><br><i>vps20Δ</i><br><i>vps24Δ</i> |                                                                                                  |                                             |                                                |

**CORVET**- class C core vacuole/endosome tethering factor, **ESCRT**- endosomal sorting complex required for transport, **HOPS**- homotypic fusion and vacuolar protein sorting. **RETROMER**- retrograde endosomal to Golgi trafficking. PI(3)P class III (VPS34, VPS30, VPS15 and VPS38) interacts with the endosomal sorting complex ESCRT-I machinery, CORVET and the late endosomal/lysosomal HOPS.

**Supplemental Table S3: Primer list**

| <b>Name</b>                         | <b>5'→ 3' sequence</b>                    |
|-------------------------------------|-------------------------------------------|
| C-ter truncated                     | CCGAATTCTCACACATCCGTGAGCTTGAC             |
| S342G fw                            | GATGTGGCCCCTGTAGGCTTCTTTCTTG TG           |
| S342G rev                           | GCACAAGAAAGAAGCCTACAGGGGCCACATC           |
| I384M fw                            | GGAGAAGCTAAACATGCTCAACAATAATTAT           |
| I384M rev                           | ATAATTATTGTTGAGCATGTTTAGCTTCTCC           |
| BamHI- <i>APOLI</i> 1 fw            | ATGCGGATTCATGAGATTCAAAGCCACAC             |
| <i>APOLI</i> -mcherry 2 rev         | TCCTCGCCCTTGCTCACCATTCCAGCTTCCTCTGCCCTCAC |
| <i>APOLI</i> -mcherry 3 fw          | GTGAGGGCAGAGGAAGCTGGAATGGTGAGCAAGGGCGAGGA |
| <i>APOLI</i> -mcherry (-stop) 4 rev | ACGTTTTGTTGCACCCTCGCCTTGTACAGCTCGTCCATGC  |
| <i>APOLI</i> -mcherry (-stop) 5 fw  | GCATGGACGAGCTGTACAAGGCGAGGGTGCAACAAAACGT  |
| <i>APOLI</i> 6 Xho1 rev             | TCAGCTCGAGTCACAGTTCTTGGTCCGCCTG           |
| BamHI-mCherry fw                    | ACGAGGATCCAATGGTGAGCAAGGGCGAGGA           |
| mCherry-XhoI rev                    | AGTCCTCGAGTTACTTGTACAGCTCGTCCAT           |



**Supplemental Table S4: Yeast strains that were used in the study**

| <b>Name</b>           | <b>Relevant genotype</b>                                                           | <b>Source</b>           |
|-----------------------|------------------------------------------------------------------------------------|-------------------------|
| WT                    | BY4741; Mat a; his3 $\Delta$ 1, leu2 $\Delta$ 0, met15 $\Delta$ 0, ura3 $\Delta$ 0 | Euroscarf               |
| <i>apm3</i> $\Delta$  | BY4741; <i>apm3</i> :: kanMX4                                                      | Euroscarf               |
| <i>atg14</i> $\Delta$ | BY4741; <i>atg14</i> :: kanMX4                                                     | Euroscarf               |
| <i>pep4</i> $\Delta$  | BY4741; <i>pep4</i> :: kanMX4                                                      | Euroscarf               |
| <i>pep5</i> $\Delta$  | BY4741; <i>pep5</i> :: kanMX4                                                      | Euroscarf               |
| <i>pep7</i> $\Delta$  | BY4741; <i>pep7</i> :: kanMX4                                                      | Euroscarf               |
| <i>pep12</i> $\Delta$ | BY4741; <i>pep12</i> :: kanMX4                                                     | Euroscarf               |
| <i>trk2</i> $\Delta$  | BY4741; <i>trk2</i> :: kanMX4                                                      | Euroscarf               |
| <i>vam3</i> $\Delta$  | BY4741; <i>vam3</i> :: kanMX4                                                      | Euroscarf               |
| <i>vam7</i> $\Delta$  | BY4741; <i>vam7</i> :: kanMX4                                                      | Euroscarf               |
| <i>vma1</i> $\Delta$  | BY4741; <i>vma1</i> :: kanMX4                                                      | Euroscarf               |
| <i>vma21</i> $\Delta$ | BY4741; <i>vma21</i> :: kanMX4                                                     | Euroscarf               |
| <i>vps2</i> $\Delta$  | BY4741; <i>vps2</i> :: kanMX4                                                      | Euroscarf               |
| <i>vps3</i> $\Delta$  | BY4741; <i>vps3</i> :: kanMX4                                                      | Euroscarf               |
| <i>vps5</i> $\Delta$  | BY4741; <i>vps5</i> :: kanMX4                                                      | Euroscarf               |
| <i>vps8</i> $\Delta$  | BY4741; <i>vps8</i> :: kanMX4                                                      | Euroscarf               |
| <i>vps13</i> $\Delta$ | BY4741; <i>vps13</i> :: kanMX4                                                     | Euroscarf               |
| <i>vps15</i> $\Delta$ | BY4741; <i>vps15</i> :: kanMX4                                                     | Euroscarf               |
| <i>vps16</i> $\Delta$ | BY4741; <i>vps16</i> :: kanMX4                                                     | Euroscarf               |
| <i>vps17</i> $\Delta$ | BY4741; <i>vps17</i> :: kanMX4                                                     | Euroscarf               |
| <i>vps18</i> $\Delta$ | BY4741; <i>vps18</i> :: kanMX4                                                     | Euroscarf               |
| <i>vps20</i> $\Delta$ | BY4741; <i>vps20</i> :: kanMX4                                                     | Euroscarf               |
| <i>vps24</i> $\Delta$ | BY4741; <i>vps24</i> :: kanMX4                                                     | Euroscarf               |
| <i>vps25</i> $\Delta$ | BY4741; <i>vps25</i> :: kanMX4                                                     | Euroscarf               |
| <i>vps26</i> $\Delta$ | BY4741; <i>vps26</i> :: kanMX4                                                     | Euroscarf               |
| <i>vps27</i> $\Delta$ | BY4741; <i>vps27</i> :: kanMX4                                                     | Euroscarf               |
| <i>vps28</i> $\Delta$ | BY4741; <i>vps28</i> :: kanMX4                                                     | Euroscarf               |
| <i>vps29</i> $\Delta$ | BY4741; <i>vps29</i> :: kanMX4                                                     | Euroscarf               |
| <i>vps30</i> $\Delta$ | BY4741; <i>vps30</i> :: kanMX4                                                     | Euroscarf               |
| <i>vps33</i> $\Delta$ | BY4741; <i>vps33</i> :: kanMX4                                                     | Euroscarf               |
| <i>vps34</i> $\Delta$ | BY4741; <i>vps34</i> :: kanMX4                                                     | Euroscarf               |
| <i>vps35</i> $\Delta$ | BY4741; <i>vps35</i> :: kanMX4                                                     | Euroscarf               |
| <i>vps36</i> $\Delta$ | BY4741; <i>vps36</i> :: kanMX4                                                     | Euroscarf               |
| <i>vps37</i> $\Delta$ | BY4741; <i>vps37</i> :: kanMX4                                                     | Euroscarf               |
| <i>vps38</i> $\Delta$ | BY4741; <i>vps38</i> :: kanMX4                                                     | Euroscarf               |
| <i>vps39</i> $\Delta$ | BY4741; <i>vps39</i> :: kanMX4                                                     | Euroscarf               |
| <i>vps41</i> $\Delta$ | BY4741; <i>vps41</i> :: kanMX4                                                     | Euroscarf               |
| <i>ypt6</i> $\Delta$  | BY4741; <i>ypt6</i> :: kanMX4                                                      | Euroscarf               |
| VPH1-GFP              | BY4741; VPH1-GFP:HIS3                                                              | (Spokoini et al., 2012) |
